# Supplementary material for: Platelets induce neutrophil extracellular traps in transfusion-related acute lung injury
Source: JCI journal article supplement (doi:10.1172/jci61303), 2012-06-11
Supplement: sd1 [file 1]

301 Moved Permanently

# Moved Permanently

The document has moved here.
